# Supplementary material for: Oxygen vacancy-engineered Fe2O3nanoarrays as free-standing electrodes for flexible asymmetric supercapacitors
Source: Royal Society of Chemistry journal article supplement (doi:10.1039/c9nr04023d), 2019-01-01
Supplement: c9nr04023d1.pdf [file c9nr04023d1.pdf]

Electronic Supplementary Information

**Oxygen-vacancy engineered Fe<sub>2</sub>O<sub>3</sub> nanoarrays as free-standing  
electrode for flexible asymmetric supercapacitors**

Fenfen Han, Jia Xu, Jie Zhou, Jian Tang\* and Weihua Tang\*

School of Chemical Engineering, Nanjing University of Science and Technology,  
Nanjing 210094, P. R. China

E-mail: fnzhoujie@njust.edu.cn and whtang@njust.edu.cn

**Table of content**

|                                        |          |
|----------------------------------------|----------|
| <b>1. Materials characterizations</b>  | <b>2</b> |
| <b>2. Electrochemical measurements</b> | <b>2</b> |
| <b>3. Results and discussion</b>       | <b>3</b> |
| <b>4. References</b>                   | <b>8</b> |

## 1. Materials characterizations

Morphologies and element distribution of composites were evaluated at field emission scanning electron microscope (FE-SEM, J Hitachi S-4800 at an accelerating voltage of 10 kV). The transmission electron microscope (TEM) images were obtained from FEI Tecnai-12 at an accelerating voltage of 120 kV. High-resolution transmission electron microscopy (HR-TEM) was performed on a FEI Tecnai F30 at an accelerating voltage of 80 kV. X-ray diffraction (XRD) patterns were recorded from Bruker D8 Advance Diffractometer, using the Cu K $\alpha$  radiation (1.54 Å) at 40 kV and 30 mA. X-ray photoelectron spectroscopy (XPS) analysis were carried out on a Thermo ESCALAB 250 X-ray photoelectron spectrometer with Al K $\alpha$  radiation (1486.7 eV). Raman spectroscopy (RM 2000 microscopic confocal Raman spectrometer) was performed by employing a 514 nm laser beam. Electron paramagnetic resonance (EPR) spectra were collected from Bruker EMX-10/12.

## 2. Electrochemical measurements

All electrochemical measurements were carried out on a CHI 760D electrochemical workstation (Shanghai, China). The three-electrode tests were performed in 2 M LiOH solution with a platinum foil as the counter electrode and a saturated calomel electrode as the reference electrode. The conductive membranes (1.0 cm  $\times$  2.0 cm) were used directly as working electrodes. For symmetrical supercapacitor, PVA/LiOH gel was used as solid electrolyte. The areal capacitance in three-electrode cell is calculated according **Equation S1**:

$$C_A = \frac{I \times \Delta t}{S \times \Delta V} \quad (1)$$

where, I is the discharge current,  $\Delta t$  is the discharged time, S is the electrode area and  $\Delta V$  is the voltage window.

The areal energy density (E) and power density (P) of symmetrical supercapacitor are calculated according to **Equation S2&3**:

$$E = \frac{1}{2} \times C_A \times \Delta V^2 \quad (2)$$

$$P = \frac{E}{\Delta t} \quad (3)$$

where,  $C_A$  is the areal specific capacitance,  $\Delta t$  is the discharged time, and  $\Delta V$  is the voltage window.

### 3. Results and discussions

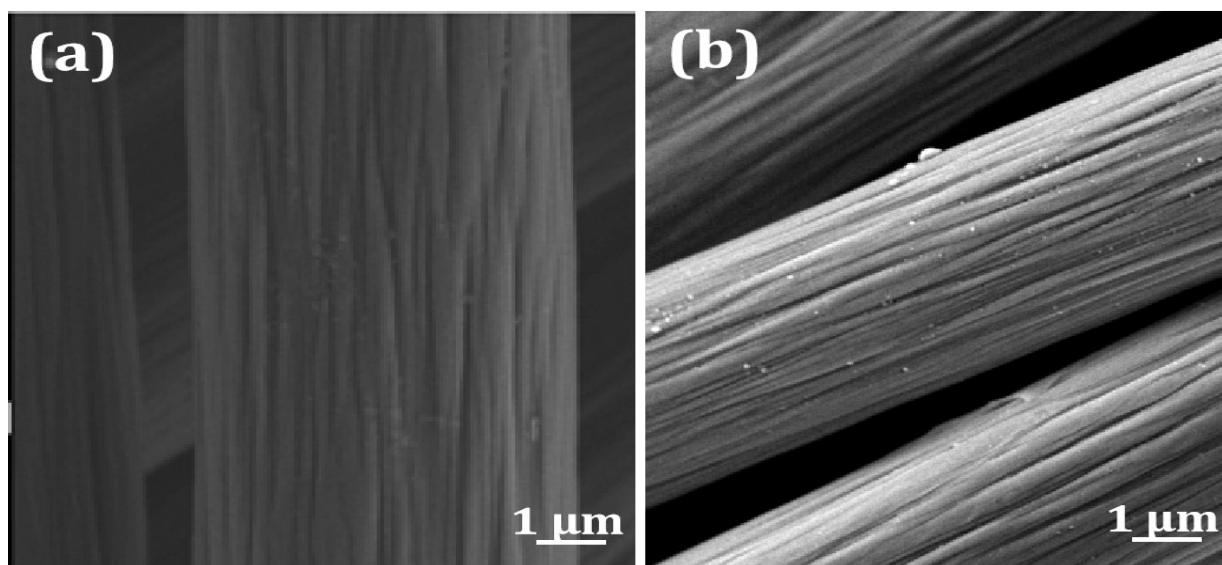

Fig. S1. SEM patterns of (a) pristine CC and PDA coated CC.

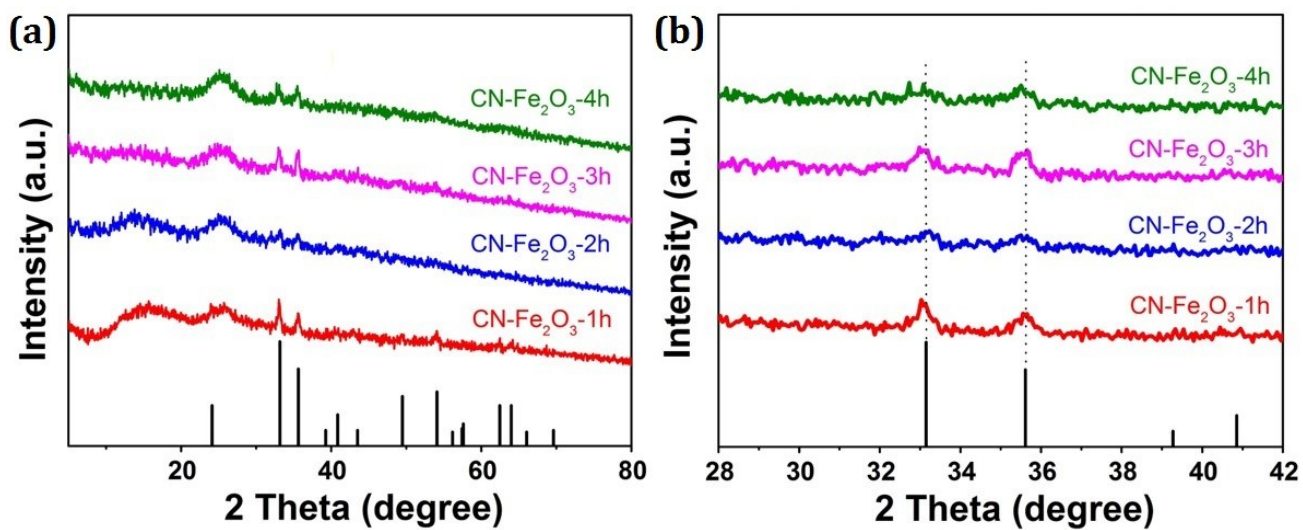

Fig. S2. XRD patterns for CN-Fe<sub>2</sub>O<sub>3</sub>-1h, CN-Fe<sub>2</sub>O<sub>3</sub>-2h, CN-Fe<sub>2</sub>O<sub>3</sub>-3h and CN-Fe<sub>2</sub>O<sub>3</sub>-4h.

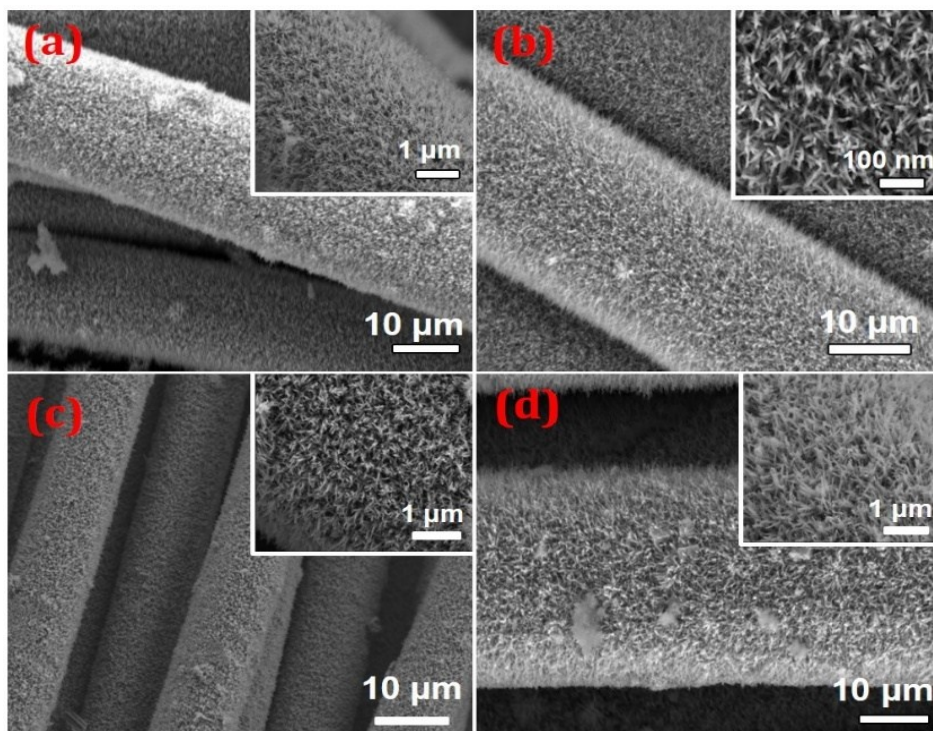

**Fig. S3.** SEM images for CN-Fe<sub>2</sub>O<sub>3</sub> at different reduction time. a) 1 h, b) 2 h, c) 3 h and d) 4 h.

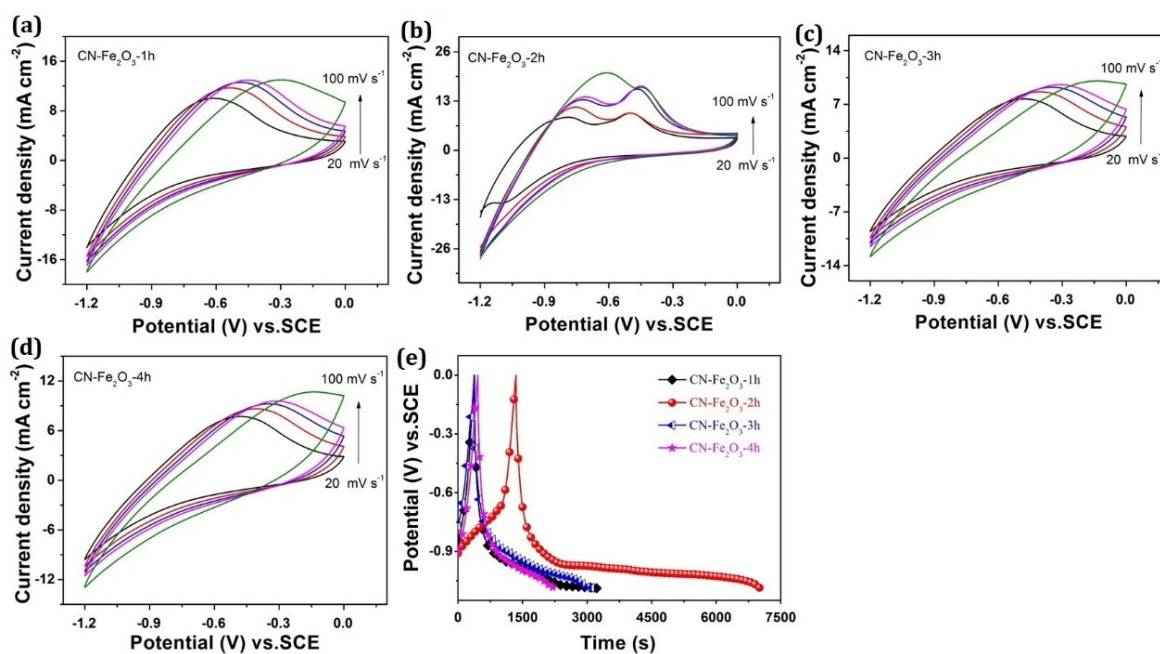

**Fig. S4.** a-d) CV curves of CN-Fe<sub>2</sub>O<sub>3</sub>-xh. e) GCD curves of CN-Fe<sub>2</sub>O<sub>3</sub>-xh at the current density of 0.5 mA cm<sup>-2</sup>.

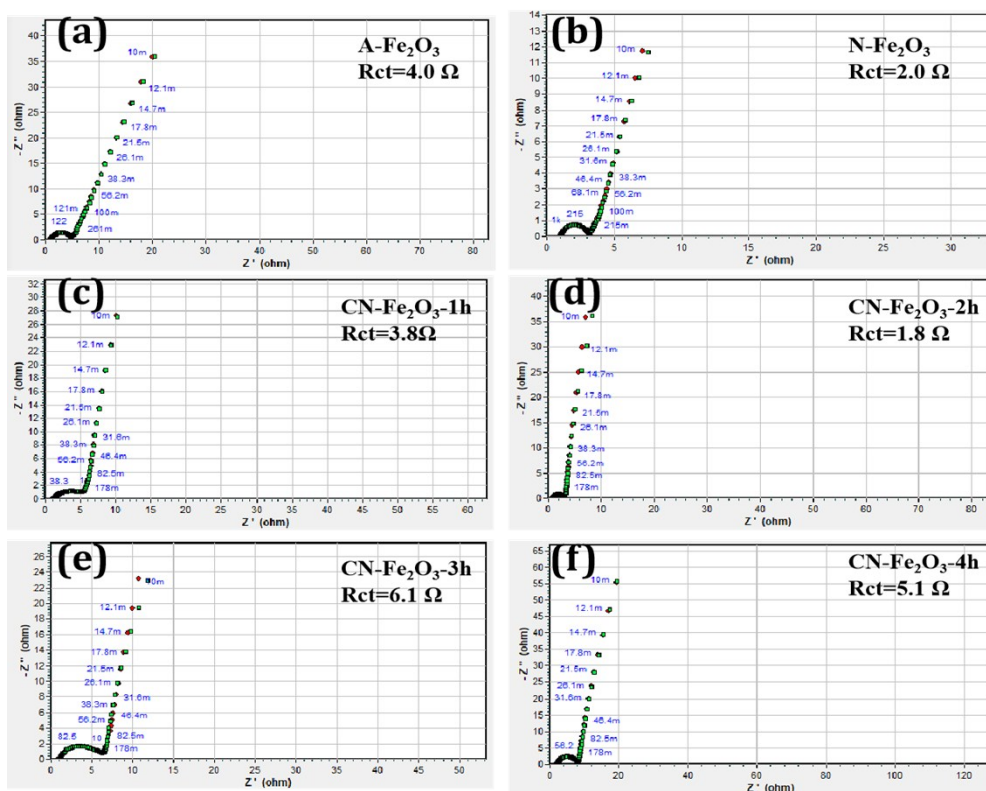

Fig. S5. The fitted Nyquist plots of a) A-Fe<sub>2</sub>O<sub>3</sub>; b) N-Fe<sub>2</sub>O<sub>3</sub>; c-d) CN-Fe<sub>2</sub>O<sub>3</sub>-xh

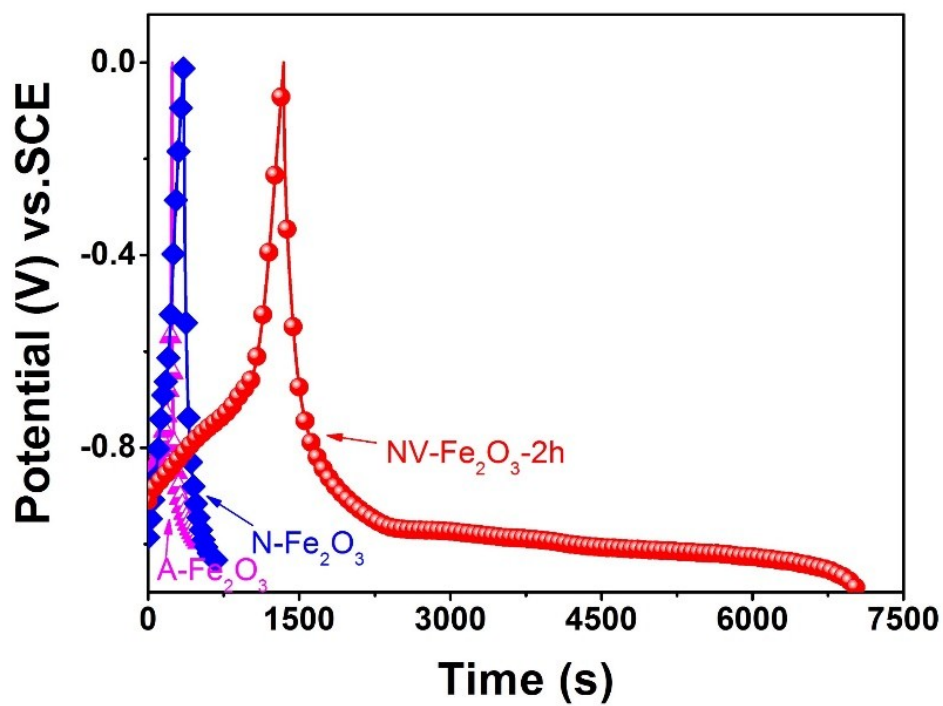

Fig. S6. GCD curves of A-Fe<sub>2</sub>O<sub>3</sub>, N-Fe<sub>2</sub>O<sub>3</sub> and CN-Fe<sub>2</sub>O<sub>3</sub>-2h at a current density of 0.5 mA cm<sup>-2</sup>.

**Table S1.** Comparison of the charge storage with free-standing Fe<sub>2</sub>O<sub>3</sub> electrodes.

| Electrodes                                           | Voltage window (V) | C <sub>A</sub> (F cm <sup>-2</sup> ) | Long-term C <sub>A</sub> retention | Ref.             |
|------------------------------------------------------|--------------------|--------------------------------------|------------------------------------|------------------|
| ASV-FO                                               | -0.9               | 0.42<br>(0.5 mA cm <sup>-2</sup> )   | 90%<br>5000                        | S2               |
| N-Fe <sub>2</sub> O <sub>3</sub>                     | -0.8               | 0.38<br>(0.5 mA cm <sup>-2</sup> )   | 95.2%<br>10000                     | S3               |
| SiC@Fe <sub>2</sub> O <sub>3</sub>                   | -1.2               | 1.00<br>(0.5 mA cm <sup>-2</sup> )   | 86.6%<br>5000                      | S4               |
| Fe <sub>2</sub> O <sub>3</sub> @ACC                  | -0.8               | 2.78<br>(0.5 mA cm <sup>-2</sup> )   | 92%<br>10000                       | S5               |
| Fe <sub>2</sub> O <sub>3</sub> -P                    | -0.8               | 0.34<br>(1 mA cm <sup>-2</sup> )     | 88%<br>9000                        | S6               |
| Ni/GF/H-Fe <sub>2</sub> O <sub>3</sub>               | -1                 | 0.69<br>(1 mA cm <sup>-2</sup> )     | 95.4%<br>50000                     | S7               |
| $\alpha$ -Fe <sub>2</sub> O <sub>3</sub> /C          | -1                 | 0.43<br>(1 mA cm <sup>-2</sup> )     | 73.2%<br>4000                      | S8               |
| S- $\alpha$ -Fe <sub>2</sub> O <sub>3</sub> @C/OCNTF | -1                 | 1.23<br>(2 mA cm <sup>-2</sup> )     | --                                 | S9               |
| CN-Fe <sub>2</sub> O <sub>3</sub> -2h                | -1.1               | 2.63<br>(0.5 mA cm <sup>-2</sup> )   | 86.7%<br>10000                     | <b>This work</b> |

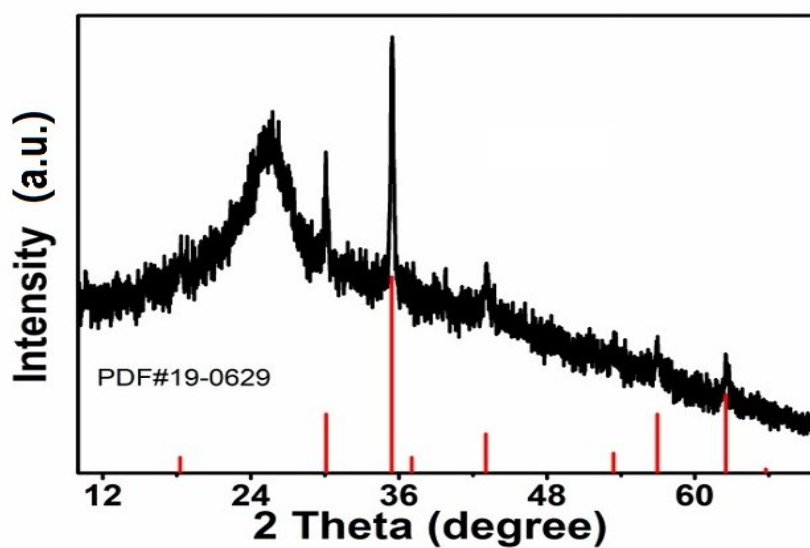**Fig. S7.** XRD patterns of CN-Fe<sub>2</sub>O<sub>3</sub>-2h after long-term cycles.

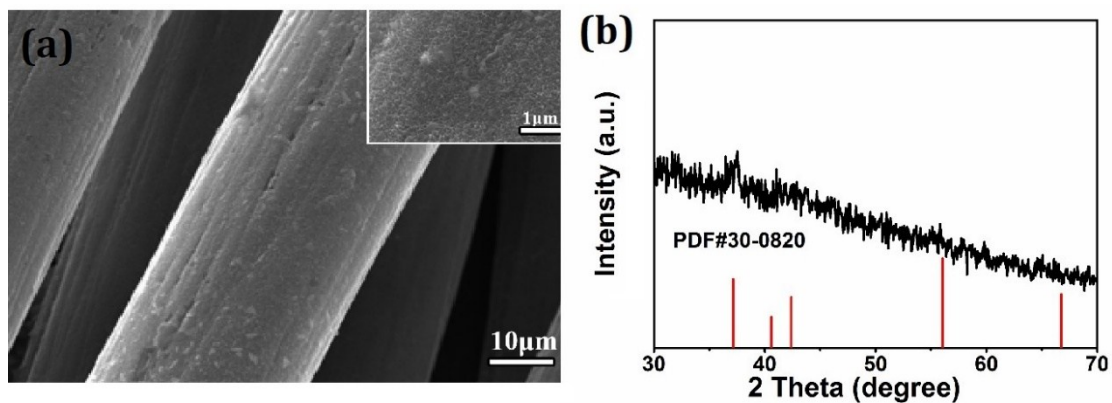

Fig. S8. a) SEM images of MnO<sub>2</sub> on CC fibers. b) XRD patterns of pristine MnO<sub>2</sub>.

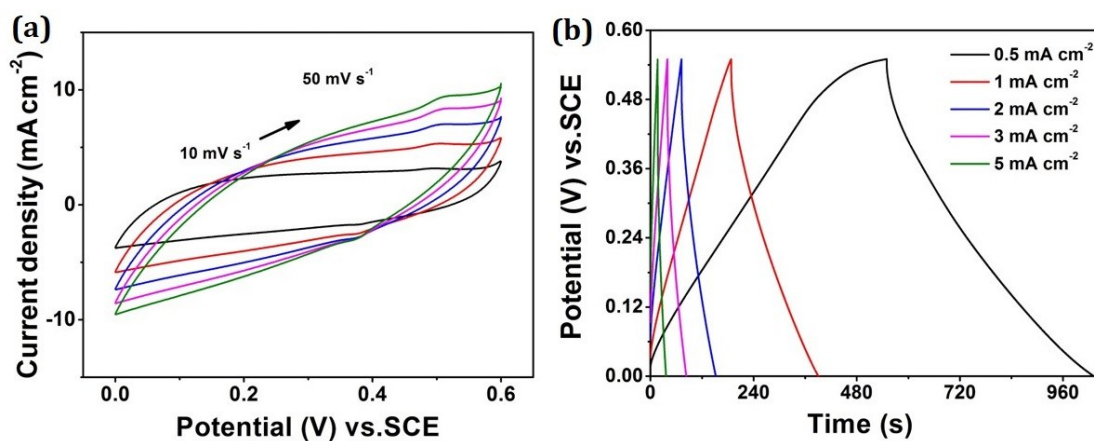

Fig. S9. a) CV curves of MnO<sub>2</sub>. b) GCD curves of MnO<sub>2</sub> at different current density from 0.5 mA cm<sup>-2</sup> to 5 mA cm<sup>-2</sup>.

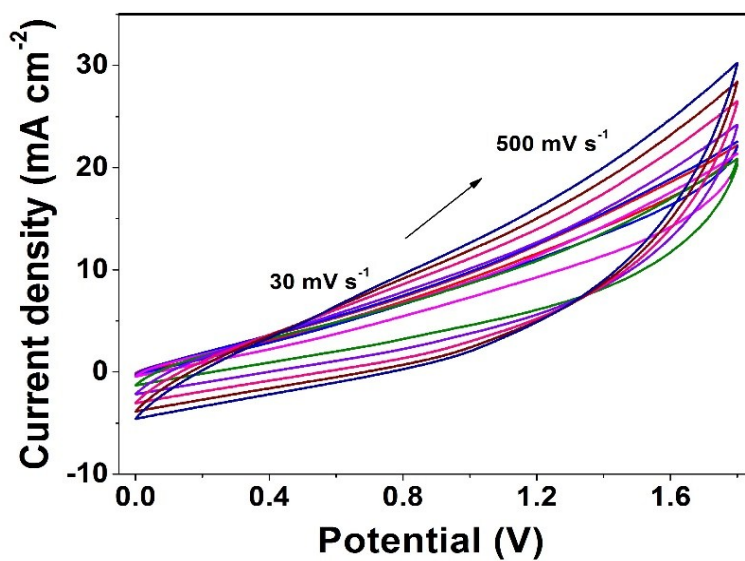

Fig. S10. CV curves of CN-Fe<sub>2</sub>O<sub>3</sub>-2h//MnO<sub>2</sub> ASC device.

#### 4. References

- [S1] Y. Zeng, Y. Han, Y. Zhao, Y. Zeng, M. Yu, Y. Liu, H. Tang, Y. Tong, X. Lu, *Adv. Energy Mater.* 2015, **5**, 1402176.
- [S2] S. Sun, T. Zhai, C. Liang, S.V. Savilov and H. Xia, *Nano Energy*. 2018, **45**, 390-397.
- [S3] X. Lu, Y. Zeng, M. Yu, T. Zhai, C. Liang, S. Xie, M.S. Balogun and Y. Tong, *Adv. Mater.* 2014, **26**, 3148-3155.
- [S4] J. Zhao, Z. Li, X. Yuan, Z. Yang, M. Zhang, A. Meng and Q. Li, *Adv. Energy Mater.* 2018, **8**, 1702787.
- [S5] J. Li, Y. Wang, W. Xu, Y. Wang, B. Zhang, S. Luo, X. Zhou, C. Zhang, X. Gu and C. Hu, *Nano Energy* 2019, **57**, 379-387.
- [S6] H. Liang, C. Xia, A.-H. Emwas, D.H. Anjum, X. Miao and H.N. Alshareef, *Nano Energy* 2018, **49**, 155-162.
- [S7] K. Chi, Z. Zhang, Q. Lv, C. Xie, J. Xiao, F. Xiao and S. Wang, *ACS Appl. Mater. Interfaces* 2017, **9**, 6044-6053.
- [S8] D. Chen, S. Zhou, H. Quan, R. Zou, W. Gao, X. Luo and L. Guo, *Chem. Eng. J.* 2018, 341, 102-111.
- [S9] Z. Zhou, Q. Zhang, J. Sun, B. He, J. Guo, Q. Li, C. Li, L. Xie, Y. Yao, *ACS nano* 2018, 12, 9333-9341.
